# Supplementary material for: Biased Inference of Selection Due to GC-Biased Gene Conversion and the Rate of Protein Evolution in Flycatchers When Accounting for It
Source: PubMed Central journal article supplement — Mol Biol Evol. 2018 Aug 2;35(10):2475–86. doi: 10.1093/molbev/msy149 (PMC6188562; doi:10.1093/molbev/msy149), 2018-08-02
Supplement: msy149_supp.pdf [file msy149_supp.pdf]

## Supplemental Material

Table S1. Estimates of  $Nw$ : the weighted change in  $N_e$  relative to 100 (and 99% CIs) of the one-step change model for S-to-W and W-to-S mutations categories in different recombination bins for datasets that include or exclude CpG-prone sites.

| Recombination   | Including CpG   |                 | Excluding CpG   |                 |
|-----------------|-----------------|-----------------|-----------------|-----------------|
|                 | Low             | High            | Low             | High            |
| S-to-W          | 330 (323 - 337) | 435 (422 - 448) | 221 (213 - 329) | 234 (226 - 242) |
| W-to-S          | 100 (90 - 110)  | 14 (12 - 16)    | 99 (89 - 109)   | 18 (14 -21)     |
| GC-conservative | 135 (127 - 142) | 100 (98 - 102)  | 123 (110 -135)  | 103 (96 - 108)  |
| Total           | 193 (191-196)   | 186 (182 - 191) | 221 (213 - 329) | 234 (226 - 242) |

Table S2. Pairwise Pearson's correlation coefficient and  $p$ -value between expression level and  $\omega$  for different tissues.

| Tissue | rho    | p-value                    |
|--------|--------|----------------------------|
| Brain  | -0.173 | $< 2.2 \times 10^{-16}***$ |
| Skin   | -0.145 | $< 2.2 \times 10^{-16}***$ |
| Kidney | -0.126 | $< 2.2 \times 10^{-16}***$ |
| Muscle | -0.105 | $< 4.5 \times 10^{-13}***$ |
| Liver  | -0.096 | $< 5.5 \times 10^{-11}***$ |
| Ovary  | -0.139 | $< 2.2 \times 10^{-16}***$ |
| Testis | -0.009 | 0.471                      |

\*\*\* denotes statistical significance at  $p < 0.001\%$  level.

Table S3. Number of genes and bins used in the analysis of every explanatory variable

| Variable                  | Number of bins | Number of genes per bin             |
|---------------------------|----------------|-------------------------------------|
| Main analysis             | 1              | 7920                                |
| Recombination             | 3              | 2640                                |
| Expression level in brain | 3              | 1986                                |
| Number of PPI             | 3              | 2640                                |
| Sex bias expression       | 3              | fb = 2760<br>un = 2902<br>mb = 1845 |
| Positive selected genes   | 1              | 79                                  |

Table S4. Total number of polymorphic and divergent sites included in the main analysis for different mutation categories.

|             |       | S-to-W | W-to-S | GC-<br>conservative | Total  |
|-------------|-------|--------|--------|---------------------|--------|
| Polymorphic | 4-fds | 1712   | 1971   | 821                 | 4504   |
|             | 0-fds | 1967   | 2295   | 762                 | 5024   |
|             | Total | 3679   | 4266   | 1583                | 9528   |
| Divergence  | 4-fds | 19542  | 47638  | 14408               | 81588  |
|             | 0-fds | 24007  | 29665  | 28189               | 81861  |
|             | Total | 43549  | 77303  | 42597               | 163449 |

Table S5.  $R^2$  between the observed and expected SFS for each mutation category.

| Category           | Bin                 | S-to-W | W-to-S | GC-conservative | Total |
|--------------------|---------------------|--------|--------|-----------------|-------|
| Average / Total    | all                 | 0.989  | 0.992  | 0.985           | 0.989 |
| Recombination      | Low                 | 0.971  | 0.984  | 0.962           | 0.980 |
|                    | Mid                 | 0.987  | 0.966  | 0.945           | 0.987 |
|                    | High                | 0.987  | 0.931  | 0.976           | 0.985 |
| Expression level   | Low                 | 0.948  | 0.930  | 0.900           | 0.951 |
|                    | Mid                 | 0.991  | 0.967  | 0.974           | 0.989 |
|                    | High                | 0.975  | 0.945  | 0.970           | 0.983 |
| PPI                | Low                 | 0.983  | 0.930  | 0.977           | 0.983 |
|                    | Mid                 | 0.975  | 0.981  | 0.982           | 0.989 |
|                    | High                | 0.991  | 0.969  | 0.907           | 0.981 |
| Sex bias           | Male-biased         | 0.995  | 0.969  | 0.925           | 0.990 |
|                    | Unbiased            | 0.988  | 0.986  | 0.921           | 0.988 |
|                    | Female-biased       | 0.948  | 0.954  | 0.970           | 0.972 |
| Positive selection | Positively selected | 0.718  | 0.890  | 0.691           | 0.920 |

All estimates are statistical significance at  $p < 0.001\%$  significance level.

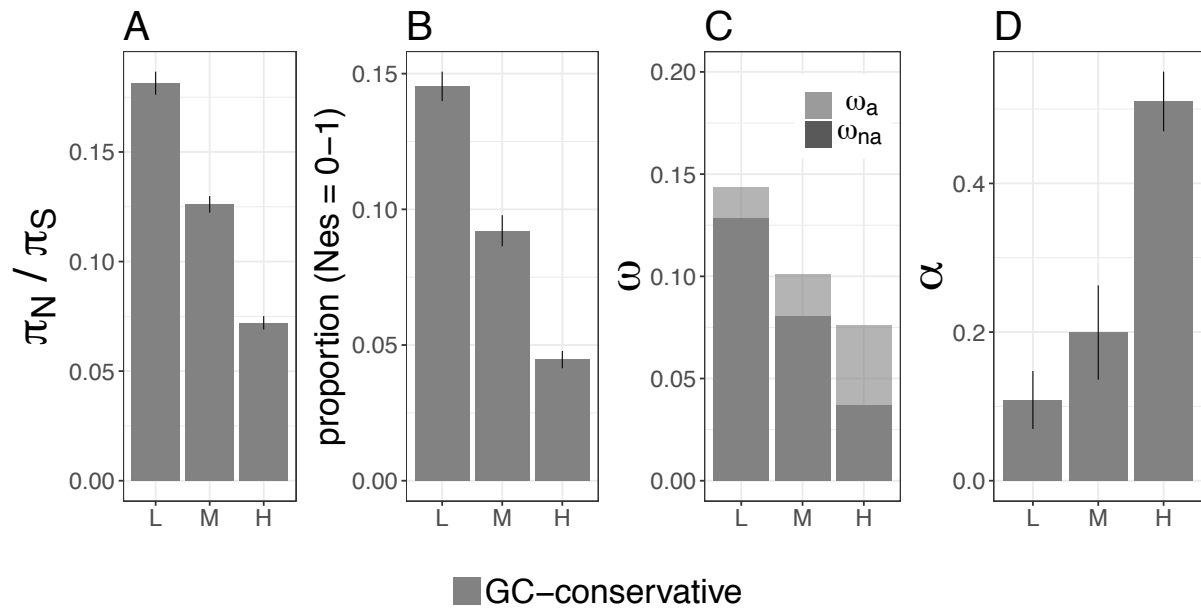

Figure S1. Estimates of five different test statistics and 99% confidence intervals for GC-conservative changes in genes with low (L), mid (M), and high (H) expression level in brain. A)  $\pi_N/\pi_S$ , B) proportion ( $N_{es} = 0-1$ ), i.e. the proportion of non-synonymous mutations for which  $N_{es} < 1$ , C)  $\omega$ , with the proportion of  $\omega$  represented by  $\omega_{na}$  and  $\omega_a$  shown in bold and light colour, respectively, and D)  $\alpha$ .

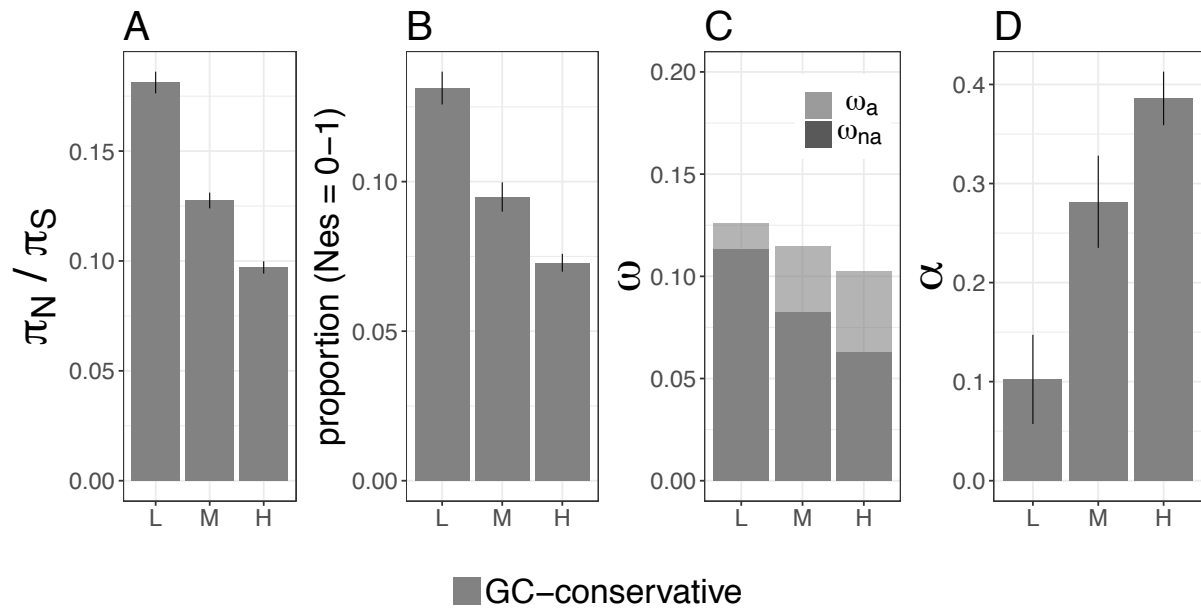

Figure S2. Estimates of five different test statistics and 99% confidence intervals for GC-conservative changes in genes with low (L), mid (M), and high (H) number of PPI. A)  $\pi_N/\pi_S$ , B) proportion ( $N_{es} = 0-1$ ), i.e. the proportion of nonsynonymous mutations for which  $N_{es} < 1$ , C)  $\omega$ , with the proportion of  $\omega$  represented by  $\omega_{na}$  and  $\omega_a$  shown in bold and light colour, respectively, and D)  $\alpha$ .

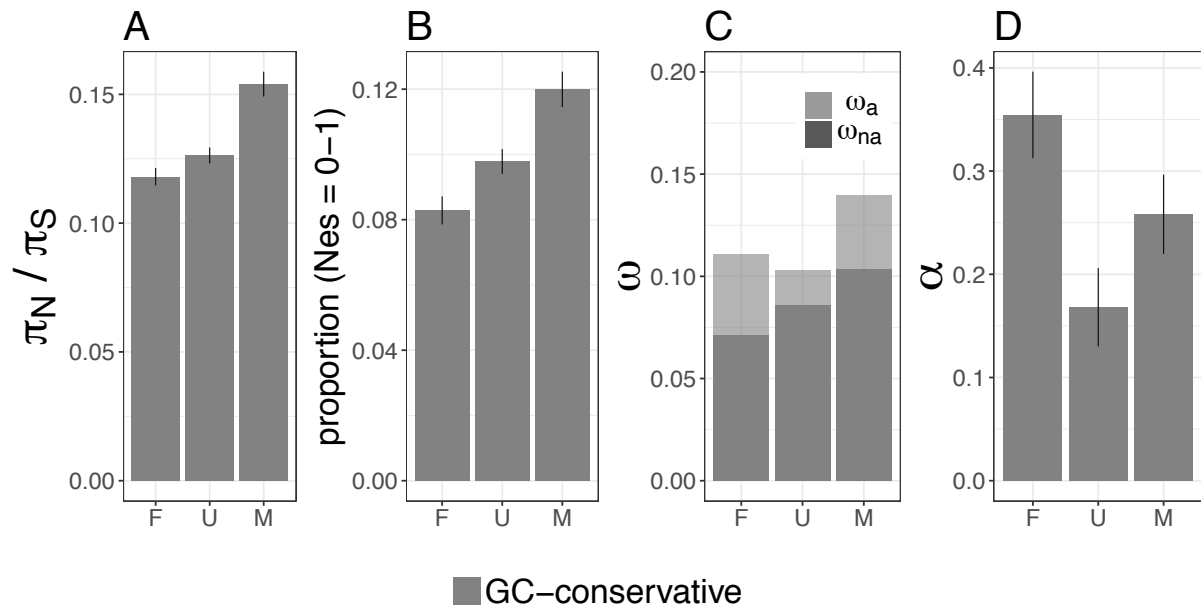

Figure S3. Estimates of five different test statistics and 99% confidence intervals for GC-conservative changes in genes with female-biased (F), unbiased (U), and male-biased (M) expression. A)  $\pi_N/\pi_S$ , B) proportion ( $N_{eS} = 0-1$ ), i.e. the proportion of non-synonymous mutations for which  $N_{eS} < 1$ , C)  $\omega$ , with the proportion of  $\omega$  represented by  $\omega_{na}$  and  $\omega_a$  shown in bold and light colour, respectively, and D)  $\alpha$ .



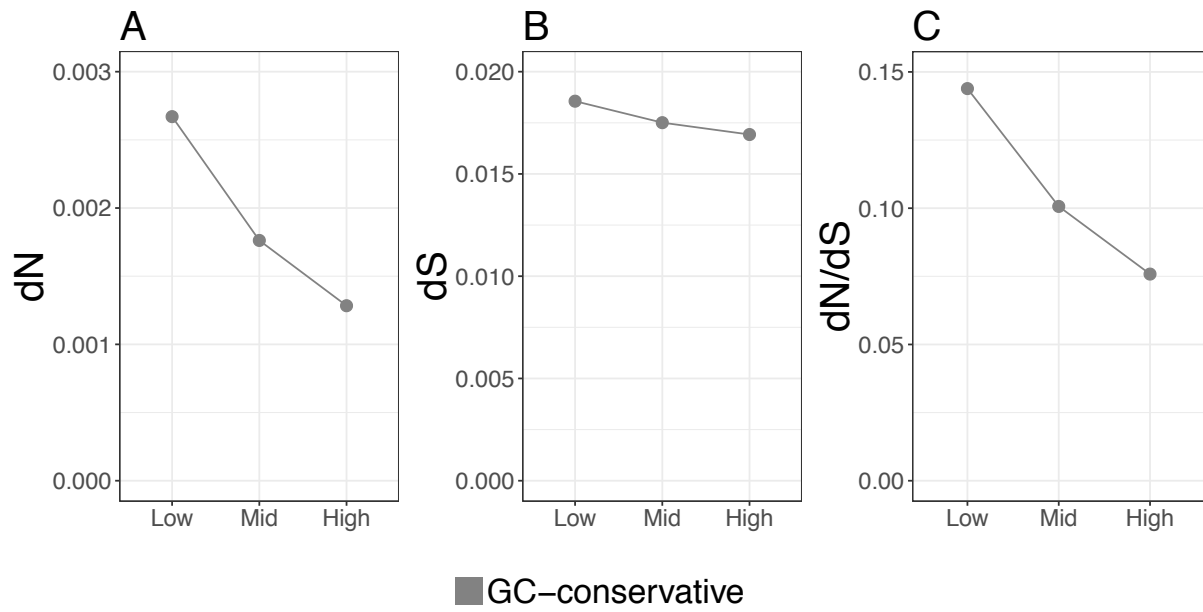

Figure S4. Estimates of divergence rates and rate ratios for GC-conservative changes in genes with low (L), mid (M), and high (H) expression level in brain. A)  $d_N$ , B)  $d_S$ , and C)  $d_N/d_S$  ( $\omega$ ).

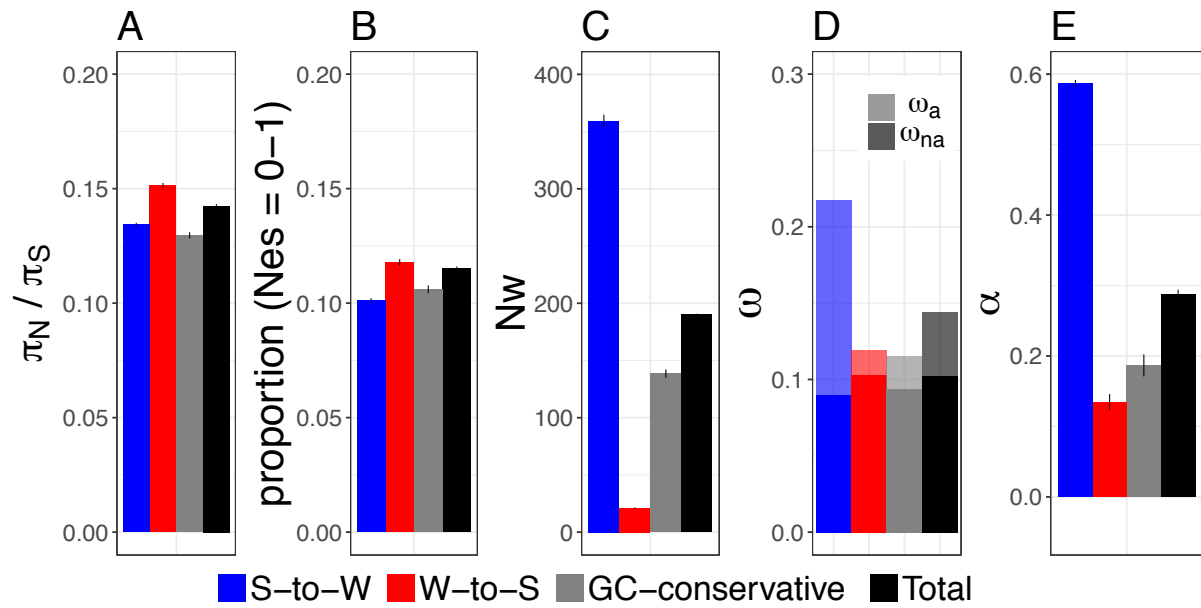

Figure S5. Estimates of six different test statistics and 99% confidence intervals for different mutation categories for a dataset including CpG-prone sites: S-to-W (blue), W-to-S (red), GC-conservative (grey) and all sites ('Total'; black). A)  $\pi_N/\pi_S$ , B) proportion ( $N_{eS} = 0-1$ ), i.e. the proportion of non-synonymous mutations for which  $N_{eS} < 1$ , C)  $N_w$ : the weighted change in  $N_e$  relative to 100, D)  $\omega$ , with the proportion of  $\omega$  represented by  $\omega_{na}$  and  $\omega_a$  shown in bold and light colour, respectively, and E)  $\alpha$ .

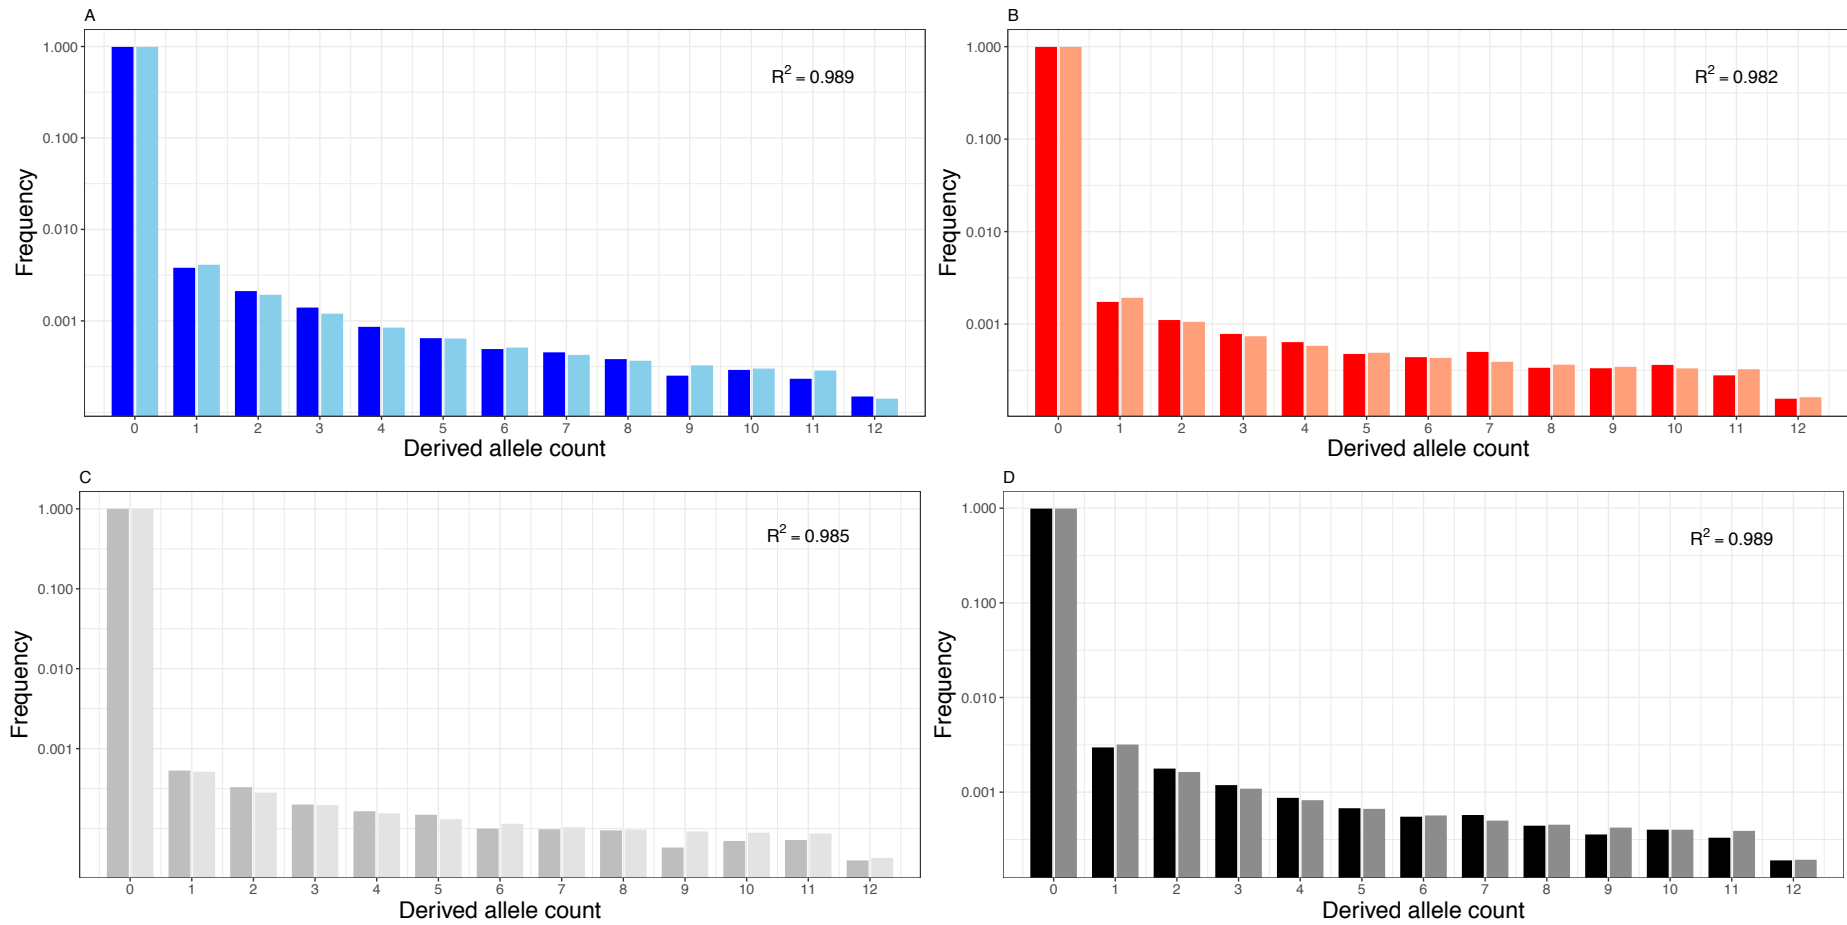

Figure S6. Observed (dark colour) vs expected (light colour) SFS of synonymous sites of the beta-fit model for each mutation category: A) S-to-W (blue), B) W-to-S (red), C) GC-conservative (grey), D) all mutations together (black).
